# Supplementary material for: Will E-Cigarette Modified Risk Messages with a Nicotine Warning Polarize Smokers’ Beliefs about the Efficacy of Switching Completely to E-Cigarettes in Reducing Smoking-Related Risks?
Source: MDPI journal article supplement (doi:10.3390/ijerph18116094), 2021-06-05
Supplement: s1 [file s1]

## Supplementary Material

Figure S1. Message Stimuli.

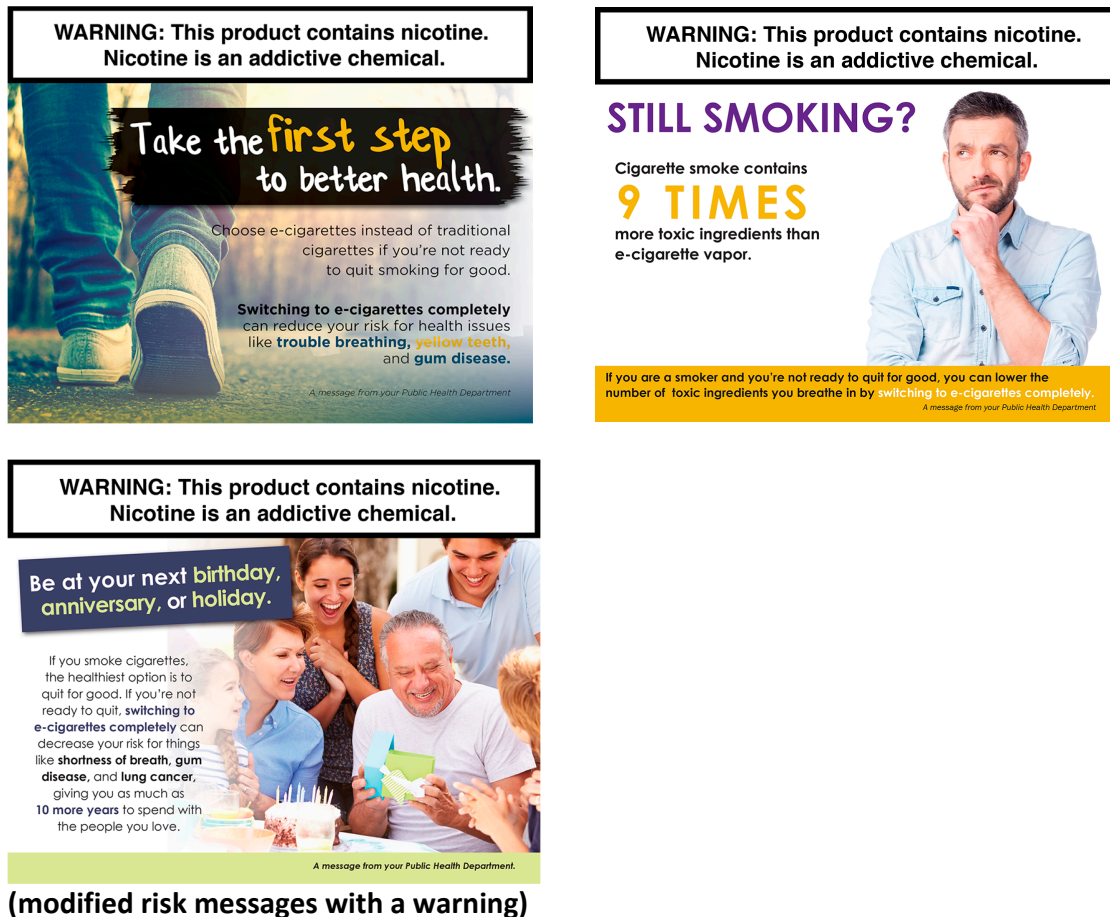

# Drink Up

Hydration is Healthy

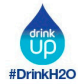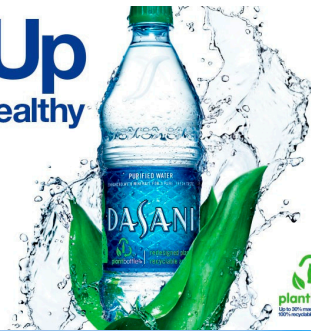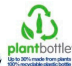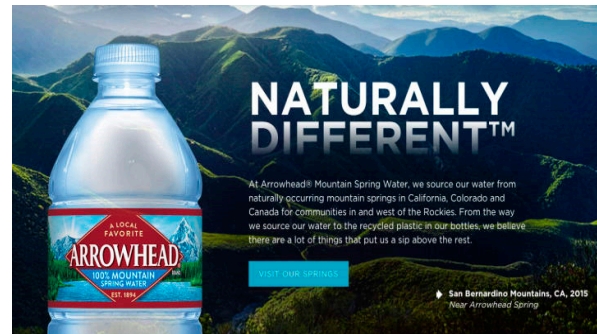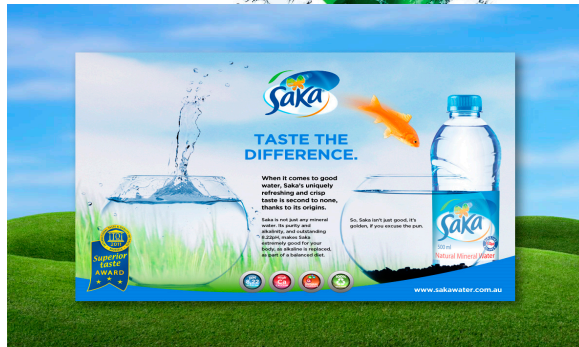

(three control messages)
